# Supplementary material
Source: publisher site journal article supplement (https://www.dovepress.com/article/supplementary_file/590211/590211%20Supplementary%20Material.docx)
Supplement: Supplementary file 1 [file 590211%20Supplementary%20Material.docx]

**Supplementary 1: Regional Determinants of Patient-Treatment Adherence questionnaire**

In this questionnaire, adherence is defined by the fact that a patient has taken their dose(s) correctly at least 80% of the prescribed days.

| **Questions** | **0%**  *(No patient)* | | | | **25%** | | | | **50%** | | | | **75%** | | | | | | **100%**  *(All patients)* | | | | |
| --- | --- | --- | --- | --- | --- | --- | --- | --- | --- | --- | --- | --- | --- | --- | --- | --- | --- | --- | --- | --- | --- | --- | --- |
| 1. What percentage of dyslipidemia patients do you estimate to be adherent: | | | | | | | | | | | | | | | | | | | | | | | |
| - To dyslipidemia treatments in general? |  | | | |  | | | |  | | | |  | | | | | |  | | | | |
| - To statins? |  | | | |  | | | |  | | | |  | | | | | |  | | | | |
| 2. According to you, among your patients, what percentage do you estimate to be adherent: | | | | | | | | | | | | | | | | | | | | | | | |
| - To dyslipidemia treatments in general? |  | | | |  | | | |  | | | |  | | | | | |  | | | | |
| - To statins? |  | | | |  | | | |  | | | |  | | | | | |  | | | | |
| 3. According to you, among your non-adherent patients, how many are intentionally non-adherent? |  | | | |  | | | |  | | | |  | | | | | |  | | | | |
| 4. Patients who are unintentionally non-adherent are likely to be helped by external support.  According to you, among your unintentional non-adherent patients, how many would be likely to show improved adherence with the help of apps/devices? |  | | | |  | | | |  | | | |  | | | | | |  | | | | |
| 5.According to you, what factors below have an influence on the non-adherence of your patients: | | | | | | | | | | | | | | | | | | | | | | | |
| 1. Perceived severity of the cardiovascular disease (coronary and ischemic stroke) |  | | | |  | | | |  | | | |  | | | | | |  | | | | |
| 1. Perceived severity of the risk factors |  | | | |  | | | |  | | | |  | | | | | |  | | | | |
| 1. Perceived susceptibility to have a cardiovascular accident |  | | | |  | | | |  | | | |  | | | | | |  | | | | |
| 1. Perceived efficacy of the treatment |  | | | |  | | | |  | | | |  | | | | | |  | | | | |
| 1. Health literacy of the patient |  | | | |  | | | |  | | | |  | | | | | |  | | | | |
| 1. Cultural beliefs |  | | | |  | | | |  | | | |  | | | | | |  | | | | |
| 1. Cost of medication |  | | | |  | | | |  | | | |  | | | | | |  | | | | |
| 1. Access to care (medical appointment, prescription, …) |  | | | |  | | | |  | | | |  | | | | | |  | | | | |
| 1. Fear of side effects |  | | | |  | | | |  | | | |  | | | | | |  | | | | |
| 1. Complexity of the treatment (treatment on empty stomach, treatment during a meal, polypharmacy, etc.) |  | | | |  | | | |  | | | |  | | | | | |  | | | | |
| 1. Timing of taking treatment |  | | | |  | | | |  | | | |  | | | | | |  | | | | |
| 1. Access to medical information |  | | | |  | | | |  | | | |  | | | | | |  | | | | |
| 1. Mental health | | | | | | | | | | | | | | | | | | | | | | | |
| - Depression |  | | | |  | | | |  | | | |  | | | | | |  | | | | |
| - Cognitive disorders |  | | | |  | | | |  | | | |  | | | | | |  | | | | |
| 1. Forgotten treatment |  | | | |  | | | |  | | | |  | | | | | |  | | | | |
| 1. Lack of support of: | | | | | | | | | | | | | | | | | | | | | | | |
| - Family members |  | | | |  | | | |  | | | |  | | | | | |  | | | | |
| - Patient associations |  | | | |  | | | |  | | | |  | | | | | |  | | | | |
| - General practitioners |  | | | |  | | | |  | | | |  | | | | | |  | | | | |
| - Cardiologist |  | | | |  | | | |  | | | |  | | | | | |  | | | | |
| - Nurse |  | | | |  | | | |  | | | |  | | | | | |  | | | | |
| - Pharmacist |  | | | |  | | | |  | | | |  | | | | | |  | | | | |
|  | | | | | | | | | | | | | | | | | | | | | | | |
| **Questions** | | | **1** | | **2** | | | **3** | | | | **4** | | | | **5** | | | | **6** | | | **7** |
| 6. Physicians always assume that their patients are:  *1: Non adherent; 7: Fully adherent* | | |  | |  | | |  | | | |  | | | |  | | | |  | | |  |
| 7. Physicians’ communication with their patients is:  *1: The same for everyone; 7: Personalized to each patient* | | |  | |  | | |  | | | |  | | | |  | | | |  | | |  |
| 8. Physicians’ questions to their patients are more:  *1: Closed; 7: Open ended* | | |  | |  | | |  | | | |  | | | |  | | | |  | | |  |
| 9. Physicians see their patient as experts of their disease:  *1: Totally disagree; 7: Totally agree* | | |  | |  | | |  | | | |  | | | |  | | | |  | | |  |
| 10. Physicians always recognize the characteristics of patients who are going to be non-adherent:  *1: Totally disagree; 7: Totally agree* | | |  | |  | | |  | | | |  | | | |  | | | |  | | |  |
| 11. I always assume that my patient is:  *1: Non adherent; 7: Fully adherent* | | |  | |  | | |  | | | |  | | | |  | | | |  | | |  |
| 12. My communication with my patients is:  *1: The same for everyone; 7: Personalized to each patient* | | |  | |  | | |  | | | |  | | | |  | | | |  | | |  |
| 13. My questions to my patients are more:  *1: Closed; 7: Open ended* | | |  | |  | | |  | | | |  | | | |  | | | |  | | |  |
| 14. I see my patients as experts of their disease:  *1: Totally disagree; 7: Totally agree* | | |  | |  | | |  | | | |  | | | |  | | | |  | | |  |
| 15. I always recognize the characteristics of patients who are going to be non-adherent:  *1: Totally disagree; 7: Totally agree* | | |  | |  | | |  | | | |  | | | |  | | | |  | | |  |
| 16. I think the relationship between patients and physicians have an impact on non-adherence:  *1: Totally disagree; 7: Totally agree* | | |  | |  | | |  | | | |  | | | |  | | | |  | | |  |
|  | | | | | | | | | | | | | | | | | | | | | | | |
| 17. In your opinion, for all physicians, the communication issues (between physicians and patients) that are associated with non-adherence are mostly related to (Tick all relevant answers) | | | | | | | | | | | | | | | | | | | | | | | |
| Age | |  | | | | | | | | | | | | | | | | | | | | | |
| Lack of time | |  | | | | | | | | | | | | | | | | | | | | | |
| Use of overly technical terms | |  | | | | | | | | | | | | | | | | | | | | | |
| Socio-cultural level | |  | | | | | | | | | | | | | | | | | | | | | |
| A paternalistic communication style | |  | | | | | | | | | | | | | | | | | | | | | |
| Lack of empathy | |  | | | | | | | | | | | | | | | | | | | | | |
| Difficulty for the physician to address the issue of risk | |  | | | | | | | | | | | | | | | | | | | | | |
| Patients who are not transparent in admitting non-adherence | |  | | | | | | | | | | | | | | | | | | | | | |
| There is no communication issue between physicians and patients | |  | | | | | | | | | | | | | | | | | | | | | |
|  | | | | | | | | | | | | | | | | | | | | | | | |
| **Question**  *(1: Totally disagree ; 7: totally agree)* | **1** | | | **2** | | | **3** | | | | **4** | | | | **5** | | | **6** | | | **7** | | |
| 18. According to you, to improve patient adherence, public policies should focus on: | | | | | | | | | | | | | | | | | | | | | | | |
| 1. Cost of medication |  | | |  | | |  | | | |  | | | |  | | |  | | |  | | |
| 1. Access to disease information |  | | |  | | |  | | | |  | | | |  | | |  | | |  | | |
| 1. Access to treatment information |  | | |  | | |  | | | |  | | | |  | | |  | | |  | | |
| 1. Perceived efficacy of the treatment |  | | |  | | |  | | | |  | | | |  | | |  | | |  | | |
| 1. Access to care |  | | |  | | |  | | | |  | | | |  | | |  | | |  | | |
|  | | | | | | | | | | | | | | | | | | | | | | | |
| **Question** | | | | | | **5%** | | | | **10%** | | | | **15%** | | | **20%** | | | | | **30%** | |
| 19. In your opinion, non-adherence leads to an increase in mortality of: | | | | | |  | | | |  | | | |  | | |  | | | | |  | |

**Supplementary 2: privacy policies**

Thank you for participating in the evaluation program for the **regional determinants of patient-treatment adherence**.

The online questionnaire is a 10-minute quantitative survey that collects information to compare regional determinants of patient-treatmentAdherence of patients treated for dyslipidemia in 4 regions: Asia, China, Latin America and Middle East.

The determinants of patient-treatmentAdherence will be evaluated in a HCPs’ perspective and in a patients’ perspective from HCPs point of view.

No information collected in this questionnaire is related to patients, and the results will be analysed, reported, and communicated in aggregate only. We look forward to sharing the results with you as soon as they become available.

All responses are completely confidential as all data are presented in aggregate form only. Please give considered and honest answers to the questions.

Yours sincerely,

**Doctor Jean-Pascal BERROU**, Global Medical Director Cardio Metabolic & Digital Health Care

Innovation & Development, Abbott Products Operations AG.

**PRIVACY POLICY FOR THE a: care regional determinants of patient-treatment adherence**

Abbott acknowledges and respects the privacy of individuals. This Privacy Policy explains how we handle the personal information provided by you in this registration form. The collection, use, retention, and disclosure of your personal information is managed as detailed below:

**Data controller of personal information collected**

Abbott will operate as Data Controller. The personal information you enter in this registration form will be shared by Abbott with its Abbott affiliate companies as necessary to fulfil the purposes described below.

**Personal information collected**

Your name and country of residence will be collected.

**Purpose for collecting personal information and its related use**

Your personal information is collected to send you a link to the survey and to analyse result country per country.

**Personal information disclosure to third parties**

We will not sell, share, or otherwise distribute your personal information to third parties except as provided for in this Privacy Policy. We may disclose your personal information to our Abbott affiliates worldwide who agree to treat it in accordance with this Privacy Policy, and always in accordance with the purposes stated above. Your personal information may also be transferred to third parties who act for or on our behalf in accordance with the purposes described above. These third parties may be located in countries or territories which may not offer the same level of data protection as the country in which you reside. They have contracted with us to use your personal information solely for the agreed purpose, not to sell your personal information to third parties, and not to disclose it to third parties except as may be required by law, as permitted by us or as stated in this Privacy Policy.

Your personal information may also be transferred to a third party if this part of our business and the personal information connected with it is sold, assigned, or transferred, in which case we would require the buyer, assignee, or transferee to treat your personal information in accordance with this Privacy Policy.

Also, your personal information may be disclosed to a third party if we are required to do so because of an applicable law, court order, or governmental regulation, or if such disclosure is otherwise necessary to support of any criminal or other legal investigation or proceeding here or abroad.

**Retention of personal information**

Your personal information will be stored for as long as the survey is available for completion, which is approximately six months from the start of the survey. After that time, your personal information will be deleted.

**Exercising of access rights and contact details**

You may request information about your personal information we collect and exercise your related access rights, including deletion of your personal information and withdrawal of your consent, by contacting [unsubscribe.regionaladherence@kpl-paris.com](mailto:unsubscribe.regionaladherence@kpl-paris.com).

Click here to acknowledge and access the questionnaire
